# Supplementary material for: Quantum tunneling during interstellar surface-catalyzed formation of water: the reaction H + H2O2 → H2O + OH
Source: Royal Society of Chemistry journal article supplement (doi:10.1039/c6cp06457d), 2016-01-01
Supplement: c6cp06457d1.pdf [file c6cp06457d1.pdf]

Electronic Supplementary Material accompanying  
Quantum tunneling during interstellar surface-catalyzed formation of water: the reaction  
 $\text{H} + \text{H}_2\text{O}_2 \rightarrow \text{H}_2\text{O} + \text{OH}$

Thanja Lamberts<sup>1</sup>, Pradipta Kumar Samanta, Andreas Köhn, and Johannes Kästner  
Institute of Theoretical Chemistry, University of Stuttgart, Stuttgart, Germany. Tel: +49 (0)711 685 64833

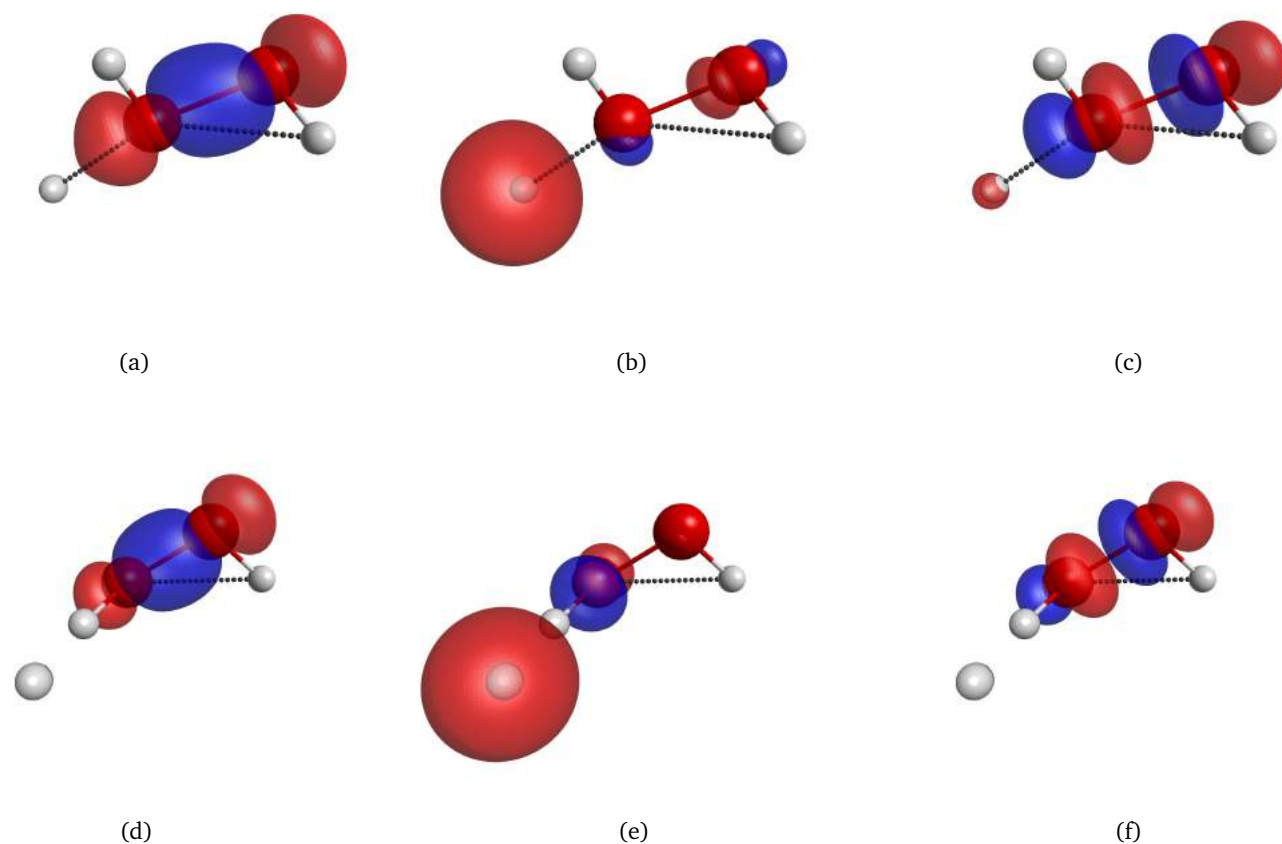

**Figure 1** Visualization of the orbitals that contribute to the main configurations to the CASSCF wavefunction for the transition states. Panels (a)-(c) concern the reaction  $\text{H} + \text{H}_2\text{O}_2 \rightarrow \text{H}_2\text{O} + \text{OH}$ , (d)-(f) concern  $\text{H} + \text{H}_2\text{O}_2 \rightarrow \text{HO}_2 + \text{H}_2$ . More specifically, panels (a) and (d) refer to the doubly occupied bonding sigma orbital, (b) and (e) to the singly occupied orbital with the main contribution from the hydrogen 1s, and (c) and (f) correspond to the doubly occupied anti-bonding sigma orbital.

<sup>1</sup>Corresponding author, E-mail: lamberts@theochem.uni-stuttgart.de

**Table 1** Coordinates of stationary points in the gas-phase reactions in Å.

| R1: $\text{H} + \text{H}_2\text{O}_2 \rightarrow \text{H}_2\text{O} + \text{OH}$ , MPW1B95/MGS |           |           |              |   |           |           |           |           |           |           |           |
|------------------------------------------------------------------------------------------------|-----------|-----------|--------------|---|-----------|-----------|-----------|-----------|-----------|-----------|-----------|
| $\text{H}_2\text{O}_2$                                                                         |           |           | PRC          |   |           | TS1       |           |           |           |           |           |
| O                                                                                              | -2.566047 | 0.007215  | -1.672615    | O | -2.523978 | 0.059220  | -1.915333 | O         | -2.456521 | 0.538181  | -0.592586 |
| O                                                                                              | -2.560618 | 0.459818  | -0.325739    | O | -2.537889 | 0.491148  | -0.561685 | O         | -2.649201 | -0.051250 | -1.972562 |
| H                                                                                              | -1.774615 | 0.027550  | 0.016493     | H | -3.312566 | -0.487467 | -1.948096 | H         | -3.509128 | -0.462642 | -1.845152 |
| H                                                                                              | -3.352004 | -0.544067 | -1.684347    | H | -1.759731 | 0.049346  | -0.213814 | H         | -1.668072 | 0.055232  | -0.332188 |
|                                                                                                |           |           |              | H | -3.314133 | -1.480655 | -4.901822 | H         | -2.516195 | -0.515257 | -3.485223 |
| $\text{H}_2\text{O}$                                                                           |           |           | OH           |   |           |           |           |           |           |           |           |
| O                                                                                              | -0.984226 | 0.010059  | 0.010222     | O | -4.417126 | -1.035022 | -3.648612 |           |           |           |           |
| H                                                                                              | -0.984226 | 0.956868  | -0.116238    | H | -4.417126 | -0.118977 | -3.333217 |           |           |           |           |
| H                                                                                              | -0.984226 | -0.116510 | 0.957017     |   |           |           |           |           |           |           |           |
| R2 $\text{H} + \text{H}_2\text{O}_2 \rightarrow \text{H}_2 + \text{HO}_2$ , M05-2X/MGS         |           |           |              |   |           |           |           |           |           |           |           |
| $\text{H}_2\text{O}_2$                                                                         |           |           |              |   |           | TS2       |           |           |           |           |           |
| O                                                                                              | -2.566047 | 0.007215  | -1.672615    |   |           |           | O         | -2.540125 | -0.086097 | -1.981867 |           |
| O                                                                                              | -2.560618 | 0.459818  | -0.325739    |   |           |           | O         | -2.428133 | 0.423187  | -0.702057 |           |
| H                                                                                              | -1.774615 | 0.027550  | 0.016493     |   |           |           | H         | -3.582191 | -0.471690 | -2.053260 |           |
| H                                                                                              | -3.352004 | -0.544067 | -1.684347    |   |           |           | H         | -1.992564 | -0.286630 | -0.218672 |           |
|                                                                                                |           |           |              |   |           |           | H         | -4.505798 | -0.872040 | -2.069527 |           |
| $\text{HO}_2$                                                                                  |           |           | $\text{H}_2$ |   |           |           |           |           |           |           |           |
| O                                                                                              | -2.564350 | 0.023913  | -1.617960    | H | -4.417126 | -0.948657 | -3.648560 |           |           |           |           |
| O                                                                                              | -2.561233 | 0.438269  | -0.379893    | H | -4.417126 | -0.207583 | -3.648560 |           |           |           |           |
| H                                                                                              | -1.757099 | 0.073540  | 0.020414     |   |           |           |           |           |           |           |           |

**Table 2** Coordinates of stationary points of the reaction  $\text{H} + \text{H}_2\text{O}_2 \longrightarrow \text{H}_2\text{O} + \text{OH}$  with spectator molecules in Å. The labeling refers to Fig. 4 of the paper.

| One spectator water molecule                        |           |           |                                    |   |           |                                   |           |                           |           |           |           |
|-----------------------------------------------------|-----------|-----------|------------------------------------|---|-----------|-----------------------------------|-----------|---------------------------|-----------|-----------|-----------|
| $\text{H}_2\text{O}_2\text{-H}_2\text{O A}$         |           |           | $\text{PRC-H}_2\text{O A}$         |   |           | $\text{TS-H}_2\text{O A}$         |           |                           |           |           |           |
| O                                                   | -5.125237 | -0.357020 | -0.778591                          | O | -5.123255 | -0.499367                         | -0.864485 | O                         | -5.048236 | -0.386637 | -0.764551 |
| H                                                   | -4.585890 | 0.177561  | -0.190993                          | H | -4.687525 | 0.048184                          | -0.206667 | H                         | -4.482890 | 0.077572  | -0.142012 |
| H                                                   | -5.506749 | -1.044859 | -0.236535                          | H | -5.540549 | -1.213000                         | -0.385296 | H                         | -5.398800 | -1.141630 | -0.295854 |
| O                                                   | -2.576310 | -0.173817 | -1.894599                          | O | -2.510508 | -0.011082                         | -1.719634 | O                         | -2.594953 | -0.059260 | -1.996704 |
| O                                                   | -2.419354 | 0.529414  | -0.666455                          | O | -2.547431 | 0.602982                          | -0.434853 | O                         | -2.394081 | 0.581132  | -0.644841 |
| H                                                   | -3.490102 | -0.482836 | -1.801743                          | H | -3.386325 | -0.425991                         | -1.741413 | H                         | -3.505927 | -0.377126 | -1.866834 |
| H                                                   | -1.697906 | 0.043091  | -0.261665                          | H | -1.853862 | 0.124421                          | 0.025295  | H                         | -1.631230 | 0.078254  | -0.350556 |
|                                                     |           |           |                                    | H | -5.620533 | -1.185713                         | -5.782503 | H                         | -2.472927 | -0.546619 | -3.522098 |
| $\text{H}_2\text{O}_2\text{-H}_2\text{O B}$         |           |           |                                    |   |           |                                   |           | $\text{TS-H}_2\text{O B}$ |           |           |           |
| O                                                   | -0.318076 | -1.212914 | -0.570619                          |   |           |                                   |           | O                         | -0.366035 | -1.207674 | -0.632668 |
| H                                                   | 0.572205  | -0.922624 | -0.761098                          |   |           |                                   |           | H                         | 0.549438  | -0.972658 | -0.773722 |
| H                                                   | -0.756050 | -1.294641 | -1.421550                          |   |           |                                   |           | H                         | -0.747114 | -1.322406 | -1.505075 |
| O                                                   | -2.632015 | -0.187597 | -1.869851                          |   |           |                                   |           | O                         | -2.688664 | -0.103423 | -1.955435 |
| O                                                   | -2.475941 | 0.557472  | -0.667333                          |   |           |                                   |           | O                         | -2.492581 | 0.635180  | -0.642629 |
| H                                                   | -3.480492 | -0.611818 | -1.722743                          |   |           |                                   |           | H                         | -3.554133 | -0.488517 | -1.788891 |
| H                                                   | -1.707185 | 0.109292  | -0.282768                          |   |           |                                   |           | H                         | -1.713126 | 0.145986  | -0.334401 |
|                                                     |           |           |                                    |   |           |                                   |           | H                         | -2.638670 | -0.530672 | -3.454237 |
| Two spectator water molecules                       |           |           |                                    |   |           |                                   |           |                           |           |           |           |
| $\text{H}_2\text{O}_2\text{-H}_2\text{O A and B}$   |           |           | $\text{PRC-H}_2\text{O A and B}$   |   |           | $\text{TS-H}_2\text{O A and B}$   |           |                           |           |           |           |
| O                                                   | -5.052208 | -0.411026 | -0.762361                          | O | -5.052208 | -0.411026                         | -0.762361 | O                         | -5.052208 | -0.411026 | -0.762361 |
| H                                                   | -4.471248 | 0.098995  | -0.189741                          | H | -4.471248 | 0.098995                          | -0.189741 | H                         | -4.471248 | 0.098995  | -0.189741 |
| H                                                   | -5.373107 | -1.141146 | -0.236406                          | H | -5.373107 | -1.141146                         | -0.236406 | H                         | -5.373107 | -1.141146 | -0.236406 |
| O                                                   | -0.374193 | -1.210476 | -0.616959                          | O | -0.374193 | -1.210476                         | -0.616959 | O                         | -0.374193 | -1.210476 | -0.616959 |
| H                                                   | 0.530795  | -0.990987 | -0.830916                          | H | 0.530795  | -0.990987                         | -0.830916 | H                         | 0.530795  | -0.990987 | -0.830916 |
| H                                                   | -0.831642 | -1.294604 | -1.457202                          | H | -0.831642 | -1.294604                         | -1.457202 | H                         | -0.831642 | -1.294604 | -1.457202 |
| O                                                   | -2.570985 | -0.089453 | -1.970360                          | O | -2.573700 | -0.104418                         | -1.970376 | O                         | -2.614762 | -0.105739 | -1.983349 |
| O                                                   | -2.442095 | 0.640165  | -0.752382                          | O | -2.443565 | 0.633823                          | -0.757516 | O                         | -2.467158 | 0.651642  | -0.678011 |
| H                                                   | -3.467036 | -0.445645 | -1.867521                          | H | -3.472348 | -0.454193                         | -1.865314 | H                         | -3.519935 | -0.441149 | -1.848034 |
| H                                                   | -1.687747 | 0.180127  | -0.353156                          | H | -1.686892 | 0.177263                          | -0.358348 | H                         | -1.691103 | 0.179774  | -0.336076 |
|                                                     |           |           |                                    | H | -3.530839 | -1.479906                         | -4.928228 | H                         | -2.535703 | -0.515154 | -3.508159 |
| Three spectator water molecules                     |           |           |                                    |   |           |                                   |           |                           |           |           |           |
| $\text{H}_2\text{O}_2\text{-H}_2\text{O A B and C}$ |           |           | $\text{PRC-H}_2\text{O A B and C}$ |   |           | $\text{TS-H}_2\text{O A B and C}$ |           |                           |           |           |           |
| O                                                   | -4.806379 | -0.676185 | -1.020481                          | O | -4.812028 | -0.721008                         | -1.033874 | O                         | -4.806379 | -0.676185 | -1.020481 |
| H                                                   | -5.442425 | -0.105454 | -0.592480                          | H | -5.545431 | -0.247308                         | -0.646236 | H                         | -5.442425 | -0.105454 | -0.592480 |
| H                                                   | -4.359460 | -1.154685 | -0.309710                          | H | -4.361410 | -1.165212                         | -0.304065 | H                         | -4.359460 | -1.154685 | -0.309710 |
| O                                                   | -0.757202 | -1.608931 | -0.896299                          | O | -0.807758 | -1.610371                         | -0.947913 | O                         | -0.757202 | -1.608931 | -0.896299 |
| H                                                   | 0.145162  | -1.376953 | -0.685917                          | O | 0.119664  | -1.432568                         | -0.806421 | H                         | 0.145162  | -1.376953 | -0.685917 |
| H                                                   | -1.153507 | -0.819453 | -1.291686                          | H | -1.200998 | -0.784148                         | -1.274892 | H                         | -1.153507 | -0.819453 | -1.291686 |
| O                                                   | -2.851068 | -1.609262 | 0.830244                           | O | -2.835769 | -1.548592                         | 0.849564  | O                         | -2.851068 | -1.609262 | 0.830244  |
| H                                                   | -2.841822 | -2.123021 | 1.635008                           | H | -2.812565 | -2.064158                         | 1.652907  | H                         | -2.841822 | -2.123021 | 1.635008  |
| H                                                   | -2.047368 | -1.837413 | 0.328419                           | H | -2.049155 | -1.790900                         | 0.325681  | H                         | -2.047368 | -1.837413 | 0.328419  |
| O                                                   | -2.394200 | 0.566795  | -1.381494                          | O | -2.416444 | 0.602948                          | -1.352822 | O                         | -2.445660 | 0.615431  | -1.450338 |
| O                                                   | -2.465767 | 1.123051  | -0.076254                          | O | -2.480406 | 1.190758                          | -0.061981 | O                         | -2.501926 | 1.178943  | -0.037112 |
| H                                                   | -3.308474 | 0.254573  | -1.515981                          | H | -3.331310 | 0.292281                          | -1.482807 | H                         | -3.357284 | 0.256582  | -1.515001 |
| H                                                   | -2.501589 | 0.334944  | 0.484601                           | H | -2.512060 | 0.414811                          | 0.515376  | H                         | -2.486160 | 0.355436  | 0.471795  |
|                                                     |           |           |                                    | H | -3.301150 | -0.958459                         | -4.559923 | H                         | -2.115470 | 0.398469  | -2.958102 |

**Table 3** Gas-phase bimolecular rate constants ( $\text{cm}^3 \text{s}^{-1}$ ) for hydrogenation and deuteration of peroxide.

| Temp. (K) | $\text{H} + \text{H}_2\text{O}_2 \longrightarrow \text{H}_2\text{O} + \text{OH}$ | $\text{H} + \text{D}_2\text{O}_2 \longrightarrow \text{HDO} + \text{OD}$ | $\text{D} + \text{H}_2\text{O}_2 \longrightarrow \text{HDO} + \text{OH}$ | $\text{D} + \text{D}_2\text{O}_2 \longrightarrow \text{D}_2\text{O} + \text{OD}$ | $\text{H} + \text{H}_2^{18}\text{O}_2 \longrightarrow \text{H}_2^{18}\text{O} + ^{18}\text{O}$ | $\text{H} + \text{H}_2\text{O}_2 \longrightarrow \text{H}_2 + \text{HO}_2$ |
|-----------|----------------------------------------------------------------------------------|--------------------------------------------------------------------------|--------------------------------------------------------------------------|----------------------------------------------------------------------------------|------------------------------------------------------------------------------------------------|----------------------------------------------------------------------------|
| 50.3      | 3.69E-19                                                                         | 2.74E-19                                                                 | 2.07E-21                                                                 | 1.57E-21                                                                         | 2.58E-19                                                                                       |                                                                            |
| 54.7      | 3.68E-19                                                                         | 2.85E-19                                                                 | 2.36E-21                                                                 | 1.78E-21                                                                         | 2.64E-19                                                                                       |                                                                            |
| 59.9      | 4.64E-19                                                                         | 3.75E-19                                                                 | 3.49E-21                                                                 | 2.63E-21                                                                         | 3.48E-19                                                                                       |                                                                            |
| 66.2      | 6.70E-19                                                                         | 5.44E-19                                                                 | 5.04E-21                                                                 | 3.85E-21                                                                         | 4.81E-19                                                                                       |                                                                            |
| 74.0      | 7.70E-19                                                                         | 6.11E-19                                                                 | 8.33E-21                                                                 | 6.45E-21                                                                         | 5.71E-19                                                                                       |                                                                            |
| 83.8      | 1.21E-18                                                                         | 9.66E-19                                                                 | 1.68E-20                                                                 | 1.29E-20                                                                         | 9.21E-19                                                                                       |                                                                            |
| 96.7      | 1.83E-18                                                                         | 1.47E-18                                                                 | 3.97E-20                                                                 | 3.10E-20                                                                         | 1.36E-18                                                                                       |                                                                            |
| 114.2     | 3.78E-18                                                                         | 3.09E-18                                                                 | 1.30E-19                                                                 | 1.03E-19                                                                         | 2.88E-18                                                                                       | 2.31E-20                                                                   |
| 139.4     | 9.87E-18                                                                         | 8.13E-18                                                                 | 7.06E-19                                                                 | 5.61E-19                                                                         | 7.64E-18                                                                                       | 1.39E-19                                                                   |
| 179.0     | 4.81E-17                                                                         | 4.01E-17                                                                 | 9.85E-18                                                                 | 8.00E-18                                                                         | 3.85E-17                                                                                       | 2.12E-18                                                                   |
| 200.0     | 9.60E-16                                                                         | 8.15E-16                                                                 |                                                                          |                                                                                  | 8.63E-16                                                                                       |                                                                            |
| 250.0     |                                                                                  |                                                                          | 3.95E-17                                                                 | 3.27E-17                                                                         |                                                                                                | 1.08E-16                                                                   |
| 414.3     |                                                                                  |                                                                          |                                                                          |                                                                                  |                                                                                                | 1.80E-14                                                                   |
| 450.0     |                                                                                  |                                                                          |                                                                          |                                                                                  |                                                                                                | 3.84E-14                                                                   |

**Table 4** Eley-Rideal bimolecular rate constants ( $\text{cm}^3 \text{s}^{-1}$ ) for hydrogenation and deuteration of peroxide with and without spectator  $\text{H}_2\text{O}$  molecules.

| Temp. (K)                                                                        | No $\text{H}_2\text{O}$ | 1 $\text{H}_2\text{O}$ A | 1 $\text{H}_2\text{O}$ B | 2 $\text{H}_2\text{O}$ | 3 $\text{H}_2\text{O}$ |
|----------------------------------------------------------------------------------|-------------------------|--------------------------|--------------------------|------------------------|------------------------|
| $\text{H} + \text{H}_2\text{O}_2 \longrightarrow \text{H}_2\text{O} + \text{OH}$ |                         |                          |                          |                        |                        |
| 50.3                                                                             | 1.09E-19                | 3.14E-19                 | 3.81E-20                 | 8.63E-20               | 1.85E-20               |
| 54.7                                                                             | 1.09E-19                | 3.00E-19                 | 4.74E-20                 | 1.11E-19               | 1.53E-20               |
| 59.9                                                                             | 1.39E-19                | 3.16E-19                 | 5.54E-20                 | 1.28E-19               | 1.80E-20               |
| 66.2                                                                             | 2.02E-19                | 7.99E-19                 | 6.11E-20                 | 1.69E-19               | 2.32E-20               |
| 74.0                                                                             | 2.35E-19                | 6.39E-19                 | 7.93E-20                 | 2.55E-19               | 2.85E-20               |
| 83.8                                                                             | 3.74E-19                | 1.01E-18                 | 1.23E-19                 | 3.45E-19               | 3.86E-20               |
| 96.7                                                                             | 5.72E-19                | 1.68E-18                 | 2.07E-19                 | 5.26E-19               | 5.71E-20               |
| 114.2                                                                            | 1.20E-18                | 3.72E-18                 | 4.03E-19                 | 9.19E-19               | 1.14E-19               |
| 139.4                                                                            | 3.18E-18                | 1.09E-17                 | 1.11E-18                 | 2.81E-18               | 3.10E-19               |
| 179.0                                                                            | 1.58E-17                | 5.37E-17                 | 5.90E-18                 | 1.51E-17               | 1.66E-18               |
| 250.0                                                                            | 3.18E-16                | 9.87E-16                 | 1.36E-16                 | 2.72E-16               | 4.37E-17               |
| $\text{D} + \text{H}_2\text{O}_2 \longrightarrow \text{HDO} + \text{OH}$         |                         |                          |                          |                        |                        |
| 50.3                                                                             | 4.76E-22                |                          |                          | 4.28E-22               | 3.55E-23               |
| 54.7                                                                             | 5.49E-22                |                          |                          | 5.50E-22               | 4.99E-23               |
| 59.9                                                                             | 8.21E-22                |                          |                          | 7.30E-22               | 6.69E-23               |
| 66.2                                                                             | 1.20E-21                |                          |                          | 1.14E-21               | 8.72E-23               |
| 74.0                                                                             | 2.01E-21                |                          |                          | 1.99E-21               | 1.39E-22               |
| 83.8                                                                             | 4.11E-21                |                          |                          | 3.98E-21               | 2.64E-22               |
| 96.7                                                                             | 9.92E-21                |                          |                          | 9.98E-21               | 6.50E-22               |
| 114.2                                                                            | 3.31E-20                |                          |                          | 3.47E-20               | 2.27E-21               |
| 139.4                                                                            | 1.84E-19                |                          |                          | 2.09E-19               | 1.36E-20               |
| 179.0                                                                            | 2.62E-18                |                          |                          | 3.10E-18               | 2.31E-19               |
| 200.0                                                                            | 1.06E-17                |                          |                          | 1.28E-17               | 1.10E-18               |

**Table 5** Langmuir-Hinshelwood unimolecular rate constants ( $s^{-1}$ ) for hydrogenation and deuteration of peroxide with and without spectator  $H_2O$  molecules.

| Temp. (K)                          | No $H_2O$ | 1 $H_2O$ A | 2 $H_2O$ | 3 $H_2O$ |
|------------------------------------|-----------|------------|----------|----------|
| $H + H_2O_2 \rightarrow H_2O + OH$ |           |            |          |          |
| 50.3                               | 3.18E+04  | 5.71E+04   |          | 8.32E+03 |
| 54.7                               | 2.66E+04  | 4.70E+04   | 3.17E+04 |          |
| 59.9                               | 2.82E+04  | 4.24E+04   |          | 5.84E+03 |
| 66.2                               | 3.39E+04  | 9.07E+04   | 2.42E+04 | 6.36E+03 |
| 74.0                               | 3.22E+04  | 6.06E+04   | 2.61E+04 | 6.56E+03 |
| 83.8                               | 4.13E+04  | 7.86E+04   | 2.76E+04 | 7.37E+03 |
| 96.7                               | 5.02E+04  | 1.05E+05   | 3.74E+04 | 8.95E+03 |
| 114.2                              | 8.14E+04  | 1.81E+05   | 5.43E+04 | 1.43E+04 |
| 139.4                              | 1.60E+05  | 3.96E+05   | 1.18E+05 | 3.01E+04 |
| 179.0                              | 5.52E+05  | 1.36E+06   | 3.99E+05 | 1.18E+05 |
| 250.0                              | 6.92E+06  | 1.54E+07   | 4.99E+06 | 2.02E+06 |
| $D + H_2O_2 \rightarrow HDO + OH$  |           |            |          |          |
| 50.3                               | 1.61E+02  |            | 8.53E+01 | 6.96e+00 |
| 54.7                               | 1.63E+02  |            | 9.33E+01 | 9.18e+00 |
| 59.9                               | 2.11E+02  |            | 1.05E+02 | 1.14e+01 |
| 66.2                               | 2.67E+02  |            | 1.38E+02 | 1.38E+01 |
| 74.0                               | 3.80E+02  |            | 2.00E+02 | 2.01E+01 |
| 83.8                               | 6.53E+02  |            | 3.28E+02 | 3.43E+01 |
| 96.7                               | 1.29E+03  |            | 6.63E+02 | 7.46E+01 |
| 114.2                              | 3.44E+03  |            | 1.81E+03 | 2.23E+02 |
| 139.4                              | 1.45E+04  |            | 8.20E+03 | 1.10E+03 |
| 179.0                              | 1.47E+05  |            | 8.54E+04 | 1.43E+04 |
| 200.0                              | 5.12E+05  |            | 3.03E+05 | 6.00E+04 |
